# Supplementary material for: Cytokine-based high log-scale expansion of functional human dendritic cells from cord-blood CD34-positive cells
Source: PubMed Central journal article supplement — Sci Rep. 2011 Nov 29;1:174. doi: 10.1038/srep00174 (PMC3240956; doi:10.1038/srep00174), 2011-11-29
Supplement: srep00174-s1.pdf [file srep00174-s1.pdf]

**Cytokine-based high log-scale expansion of functional human dendritic cells from  
cord-blood CD34-positive cells**

Yui Harada<sup>1,2,3</sup>, Yae Okada-Nakanishi<sup>3</sup>, Yasuji Ueda<sup>2, 5</sup>, Shunichi Tsujitani<sup>3</sup>,  
Satoru Saito<sup>2,3</sup>, Terumi Fuji-Ogawa<sup>2</sup>, Akihiro Iida<sup>5</sup>, Mamoru Hasegawa<sup>5</sup>,  
Tomohiko Ichikawa<sup>1</sup>, and Yoshikazu Yonemitsu<sup>2,3</sup>

<sup>1</sup>Departments of Urology, Chiba University Graduate School of Medicine, Chiba  
260-8670, Japan

<sup>2</sup>Department of Gene Therapy, Chiba University Graduate School of Medicine, Chiba,  
Japan

<sup>3</sup>R&D Laboratory for Innovative Biotherapeutics, Kyushu University Graduate School  
of Pharmaceutical Sciences, Fukuoka 812-8582, Japan

<sup>4</sup>Department of Surgery and Science, Graduate School of Medical Sciences, Kyushu  
University, Fukuoka 812-8582, Japan

<sup>5</sup>DNAVEC Corporation, Tsukuba, Ibaraki, Japan

All correspondence to: **Yui Harada, Ph.D.**  
R&D Laboratory for Innovative Biotherapeutics  
Graduate School of Pharmaceutical Sciences, Kyushu University  
3-1-1 Maidashi, Higashi-ku, Fukuoka 812-8582, JAPAN  
Phone/Fax: +81-92-642-4777

Correspondence and requests for materials should be addressed to Y.H.  
(rkfraile@med.kyushu-u.ac.jp)

# Supplementary Figure 1.

a.

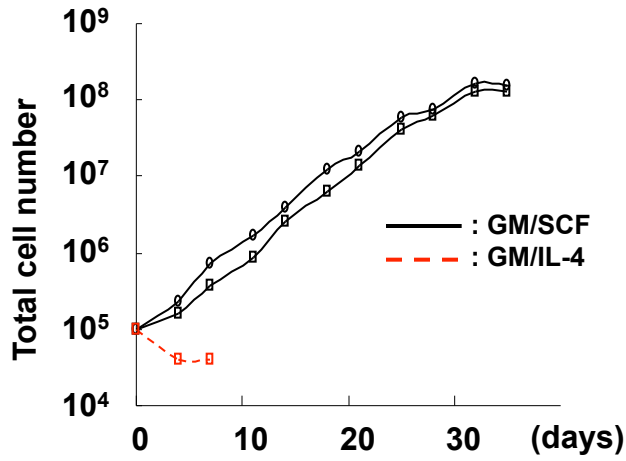

b.

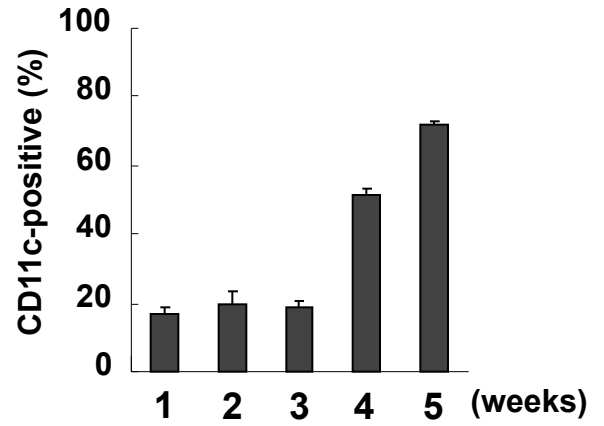

c.

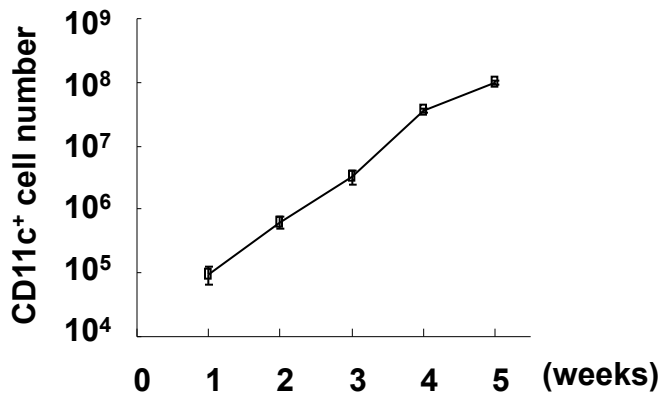

# Supplementary Figure 2.

**Ex-GSDC**

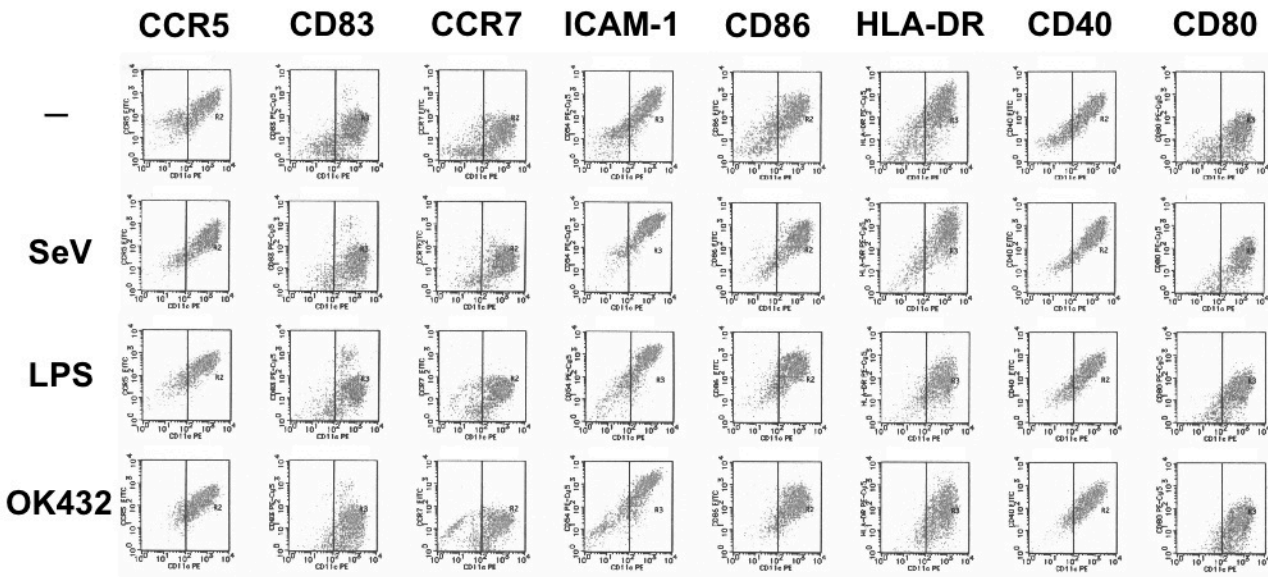

**Ex-G4DC**

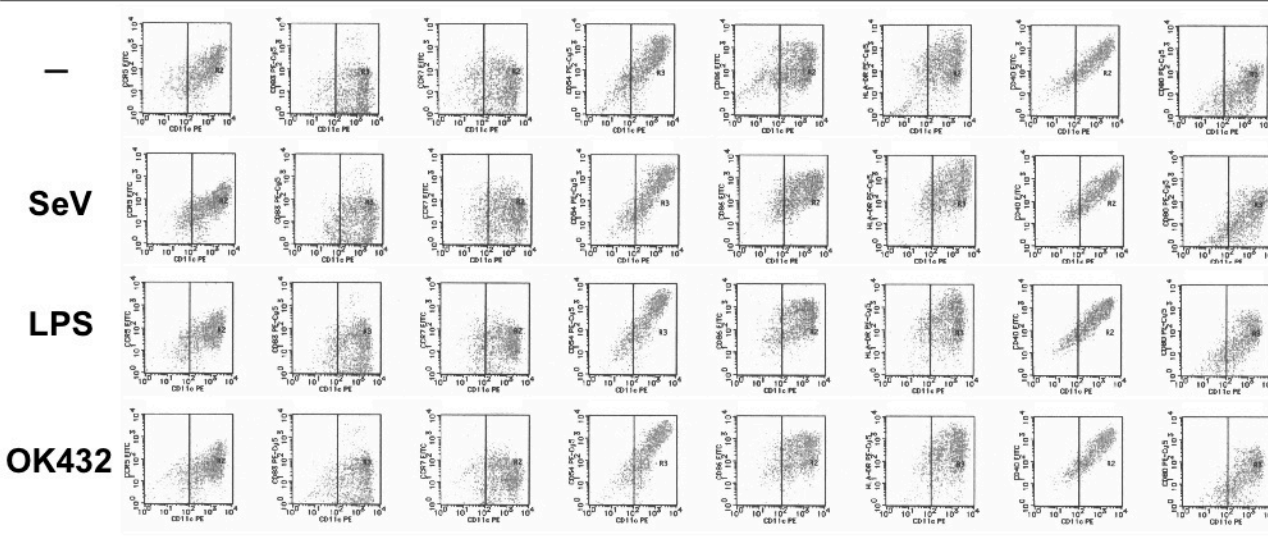

**Md-DC**

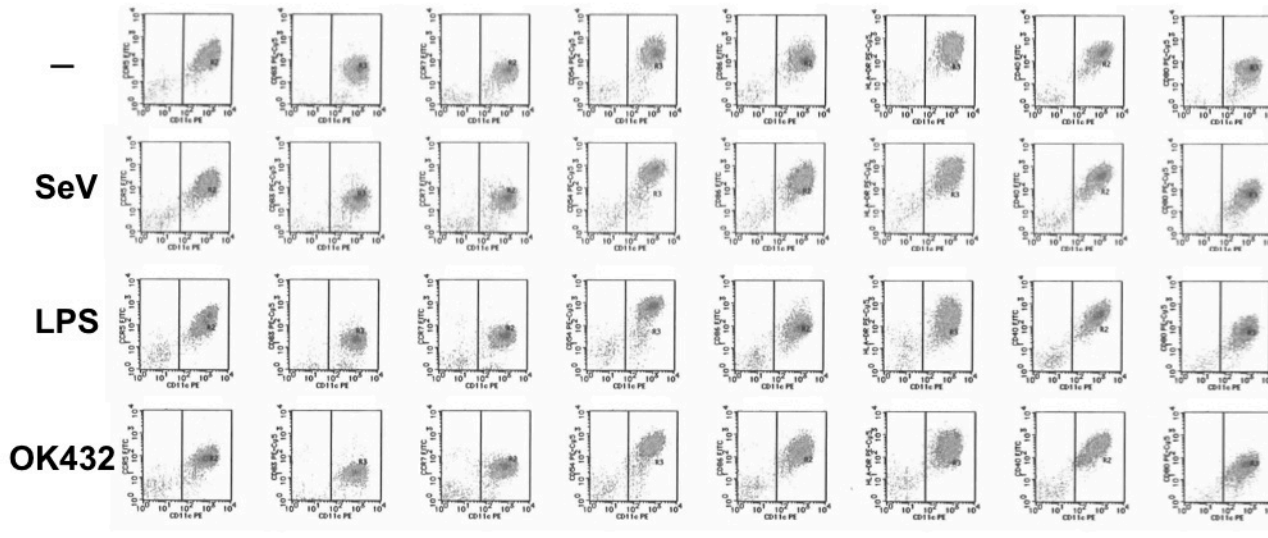

**CD11c**

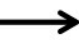

**Supplementary Table 1.**

|                                         | <b>Ex-GS</b> | <b>Ex-G4</b> | <b>mdDC</b> |
|-----------------------------------------|--------------|--------------|-------------|
| <b>CD1a</b>                             | -            | -            | -           |
| <b>CD1d</b>                             | +/-          | -            | -           |
| <b>CD3</b>                              | -            | -            | -           |
| <b>CD11b</b>                            | +++          | +++          | +++         |
| <b>CD11c</b>                            | +++          | +++          | +++         |
| <b>CD14</b>                             | ++           | +/-          | +/-         |
| <b>CD33</b>                             | +            | +            | +           |
| <b>CD40</b>                             | ++           | +++          | ++          |
| <b>CD45 (B220)</b>                      | -            | -            | -           |
| <b>CD54 (ICAM-1)</b>                    | +++          | +++          | +           |
| <b>CD80</b>                             | +            | +            | +           |
| <b>CD83</b>                             | +            | +            | +           |
| <b>CD86</b>                             | ++           | ++           | ++          |
| <b>CD123 (IL-3R<math>\alpha</math>)</b> | -            | -            | -           |
| <b>CD195 (CCR5)</b>                     | +            | +/-          | +/-         |
| <b>CD197 (CCR7)</b>                     | +/-          | +/-          | +/-         |
| <b>HLA-DR</b>                           | ++           | ++           | ++          |
| <b>HLA-ABC</b>                          | ++           | ++           | ++          |
| <b>CD207 (Langerin)</b>                 | -            | -            | -           |
| <b>CD324 (E-cadherin)</b>               | +            | -            | +           |

**Supplementary Figure 1. Cytokine-based expansion of PB CD34<sup>+</sup> cell-derived CD11c<sup>+</sup> cells.**

**a.** Growth curve of total cells from PB CD34<sup>+</sup> cells under GM/SCF (black line) or GM/IL-4 (red line).

**b.** CD11c-positive ratio of expanded cells under GM-CSF and SCF. The ratio of proliferating cells during cultivation under GM/SCF gradually increased, exceeding 70% after 5 weeks' cultivation.

**c.** Growth curve of CD11c<sup>+</sup> cells from PB CD34<sup>+</sup> cells.

These experiments were repeated twice in 2 individuals.

**Supplementary Figure 2. FACS profiles of the DCs.**

**Supplementary Table 1. Surface markers of each DC.**
